# Supplementary material for: Predicting factors associated with under-5 mortality in India using machine learning algorithms: evidence from National Family Health Survey, 2019-21
Source: Research Square preprint supplement (doi:10.21203/rs.3.rs-5309131/v1), 2024-10-23
Supplement: Supplementary file 1 [file fd09625a8a6535010ca93426.docx]

**Table 1: Distribution of children’s deaths based on sociodemographic factors, India, 2019-21**

|  |  |  |
| --- | --- | --- |
| **Attributes** | **Group** | **(%) of Child Dead** |
|  |  |  |
|  |  |  |
| **Religion** |  |  |
|  | Hindu | 3.94 |
|  | Muslims | 3.36 |
|  | Christian | 2.96 |
|  | Sikh | 3.27 |
|  | Others | 2.76 |
|  |  |  |
| **Source Drink Water** |  |  |
|  | Clean Source of Drinking | 3.75 |
|  | Unclean Source of Drinking | 4.71 |
|  |  |  |
| **Toilet facility** |  |  |
|  | Using an improved sanitation facility | 3.35 |
|  | Using an unimproved sanitation facility | 4.71 |
|  |  |  |
| **Fuel** |  |  |
|  | Clean Fuel | 2.88 |
|  | Unclean fuel | 4.38 |
|  |  |  |
| **Floor Material** |  |  |
|  | Cane/Palm/Trunks/Dirt /Bamboo/Mud | 4.66 |
|  | Cement and Others | 3.05 |
|  | No House | 4.02 |
|  |  |  |
| **Place of delivery** |  |  |
|  | Home | 5.30 |
|  | Hospital | 3.48 |
|  | Others | 7.93 |
|  |  |  |
| **Duration of Breastfeeding** |  |  |
|  | 1-2 Year | 6.04 |
|  | 2-4 Year | 0.51 |
|  | 4 and above | 0.01 |
|  | Never and Others | 20.88 |
|  |  |  |
| **Birth order** |  |  |
|  | One | 2.50 |
|  | Two | 6.84 |
|  | Three and above | 14.58 |
|  |  |  |
| **Marriage to first birth interval** |  |  |
|  | Below 12 Months | 3.52 |
|  | 12 to 36 months | 3.60 |
|  | 37 to 60 months | 4.29 |
|  | 60 months and above | 5.07 |
|  |  |  |
| **Mother Occupation** |  |  |
|  | Tertiary Sector | 2.43 |
|  | Secondary Sector | 2.90 |
|  | Primary Sector | 4.36 |
|  | Not working for 12 Months & Others | 3.73 |
|  |  |  |
| **Head of Household Occupation** |  |  |
|  | Tertiary Sector | 2.51 |
|  | Secondary Sector | 3.53 |
|  | Primary Sector | 4.10 |
|  | Students & Don't Know | 2.82 |
|  |  |  |
| **Region** |  |  |
|  | Northern Region | 2.92 |
|  | Central Region | 5.12 |
|  | Eastern Region | 4.31 |
|  | North-Eastern Region | 2.99 |
|  | Western Region | 3.06 |
|  | Southern Region | 2.44 |
|  |  |  |
| **Place of residence** |  |  |
|  | Urban | 2.79 |
|  | Rural | 3.98 |
|  |  |  |
| **Education** |  |  |
|  | No education | 5.24 |
|  | Incomplete primary | 4.49 |
|  | Incomplete Secondary | 3.38 |
|  | Secondary and Higher | 2.11 |
|  |  |  |
| **Wealth Index** |  |  |
|  | Poor | 4.63 |
|  | Middle | 3.31 |
|  | Rich | 2.50 |
|  |  |  |
| **Sex of child** |  |  |
|  | Male | 4.01 |
|  | Female | 3.44 |
|  |  |  |
| **ANC Visit** |  |  |
|  | No Visit | 3.78 |
|  | 1-3 Visit | 2.97 |
|  | 4-6 Visit | 2.36 |
|  | 6+ Visit | 1.59 |

**Table 2: Multivariate Logistic Regression for predicting the factors for under-five mortality data**

| **Attributes** | **AOR** | **Confidence**  **Interval** |  | **P>z** |  |
| --- | --- | --- | --- | --- | --- |
|  |  | **UCL** | **LCL** |  |  |
|  |  |  |  |  |  |
| **Religion** |  |  |  |  |  |
| Hindu | 1.000 |  |  |  |  |
| Muslims | 0.583 | 0.465 | 0.732 | **0.000** |  |
| Christian | 0.795 | 0.545 | 1.158 | 0.232 |  |
| Sikh | 0.781 | 0.435 | 1.404 | 0.409 |  |
| Others | 0.642 | 0.359 | 1.150 | 0.136 |  |
|  |  |  |  |  |  |
| **Fuel** |  |  |  |  |  |
| Clean Fuel | 1.000 |  |  |  |  |
| Unclean fuel | 1.211 | 1.004 | 1.462 | **0.045** |  |
|  |  |  |  |  |  |
| **Place of Delivery** |  |  |  |  |  |
| Home | 1.000 |  |  |  |  |
| Hospital | 0.795 | 0.653 | 0.969 | **0.023** |  |
| Others | 2.484 | 0.754 | 8.187 | 0.135 |  |
|  |  |  |  |  |  |
| **Duration of Breastfeeding** |  |  |  |  |  |
| 1-2 Year | 1.000 |  |  |  |  |
| 2-4 Year | 0.080 | 0.049 | 0.128 | **0.000** |  |
| 4 and above | 0.001 | 0.000 | 0.008 | **0.000** |  |
| Never and Others | 3.693 | 3.132 | 4.353 | **0.000** |  |
|  |  |  |  |  |  |
| **Birth order** |  |  |  |  |  |
| One | 1.000 |  |  |  |  |
| Two | 1.341 | 0.998 | 1.801 | **0.051** |  |
| Three and above | 3.441 | 2.180 | 5.431 | **0.000** |  |
|  |  |  |  |  |  |
| **Marriage to first birth interval** |  |  |  |  |  |
| **Below 12 Months** | 1.000 |  |  |  |  |
| 12 to 36 months | 1.008 | 0.839 | 1.210 | 0.935 |  |
| 37 to 60 months | 1.158 | 0.893 | 1.502 | 0.268 |  |
|  |  |  |  |  |  |
|  |  |  |  |  |  |
| **Region** |  |  |  |  |  |
| Northern Region | 1.000 |  |  |  |  |
| Central Region | 1.493 | 1.145 | 1.947 | **0.003** |  |
| Eastern Region | 1.268 | 0.952 | 1.688 | 0.104 |  |
| North-Eastern Region | 0.563 | 0.393 | 0.805 | **0.002** |  |
| Western Region | 0.773 | 0.564 | 1.060 | 0.109 |  |
| Southern Region | 0.564 | 0.402 | 0.792 | **0.001** |  |
|  |  |  |  |  |  |
| **Education** |  |  |  |  |  |
| No education | 1.000 |  |  |  |  |
| Incomplete primary | 0.937 | 0.741 | 1.185 | 0.587 |  |
| Incomplete Secondary | 0.940 | 0.782 | 1.130 | 0.51 |  |
| secondary and Higher | 0.647 | 0.477 | 0.878 | **0.005** |  |
|  |  |  |  |  |  |
| **Wealth index** |  |  |  |  |  |
| Poor | 1.000 |  |  |  |  |
| Middle | 0.793 | 0.630 | 0.998 | **0.048** |  |
| Rich | 0.670 | 0.510 | 0.881 | **0.004** |  |
|  |  |  |  |  |  |
| **Sex of child** |  |  |  |  |  |
| Male | 1.000 |  |  |  |  |
| Female | 0.811 | 0.703 | 0.936 | **0.004** |  |
|  |  |  |  |  |  |
| **ANC Visit** |  |  |  |  |  |
| No Visit | 1.000 |  |  |  |  |
| 1-3 Visit | 0.768 | 0.914 | 1.720 | 0.16 |  |
| 4-6 Visit | 0.684 | 1.121 | 2.153 | **0.008** |  |
| 6+ Visit | 0.643 | 0.798 | 1.674 | 0.443 |  |
|  |  |  |  |  |  |

Note: AOR refers to Adjusted odds ratio, CI Confidence interval

**Table 3: Performance of predictive models for under-5 mortality using the test data**

| Evaluation Matrix | Model Prediction | | | | | | | | |
| --- | --- | --- | --- | --- | --- | --- | --- | --- | --- |
|  |  | Logistic Tree | | DT | | K-NN | | SVM | |
| C. Matrix | Observed | Predicted | | Predicted | | Predicted | | Predicted | |
|  |  | Alive | Dead | Alive | Dead | Alive | Dead | Alive | Dead |
|  | Alive | 41467 | 3377 | 44809 | 35 | 44489 | 355 | 44809 | 0 |
|  | Dead | 1259 | 481 | 809 | 931 | 1628 | 112 | 1775 | 0 |
| Accuracy (%) |  | 90.00 | | 96.35 | | 92.66 | | 96.21 | |
| Recall (%) |  | 28.00 | | 30.00 | | 6.00 | | 0.00 | |
| Precision (%) |  | 12.00 | | 60.00 | | 23.00 | | 0.00 | |
| F1 Score (%) |  | 17.00 | | 26.00 | | 22.00 | | 0.00 | |
| AUROC (%) |  | 60.05 | | 65.00 | | 51.00 | | 52.70 | |
